# Supplementary material for: Pathological Evaluation of Porcine Circovirus 2d (PCV2d) Strain and Comparative Evaluation of PCV2d and PCV2b Inactivated Vaccines against PCV2d Infection in a Specific Pathogen-Free (SPF) Yucatan Miniature Pig Model
Source: MDPI journal article supplement (doi:10.3390/vaccines10091469), 2022-09-05
Supplement: s1 [file s1]

## Pig #1

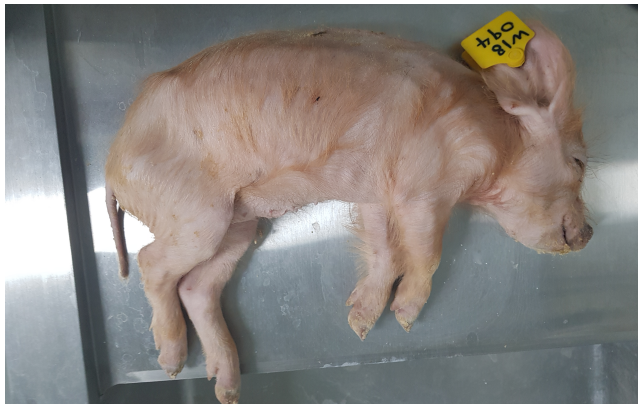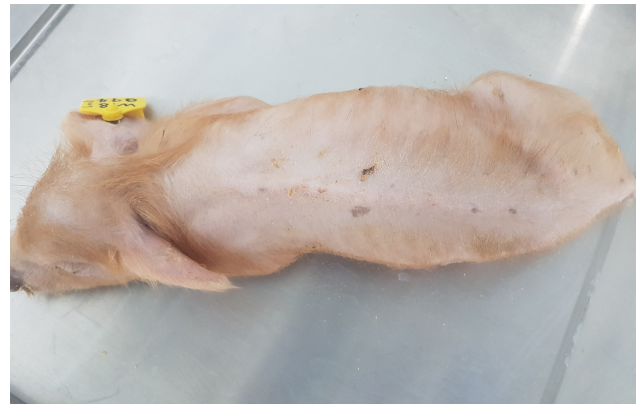

Rough hair coat  
Wasting  
Pale skin  
Prominent backbone

## Pig #2

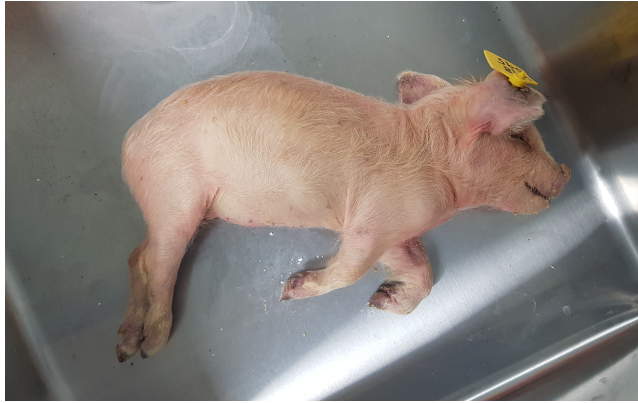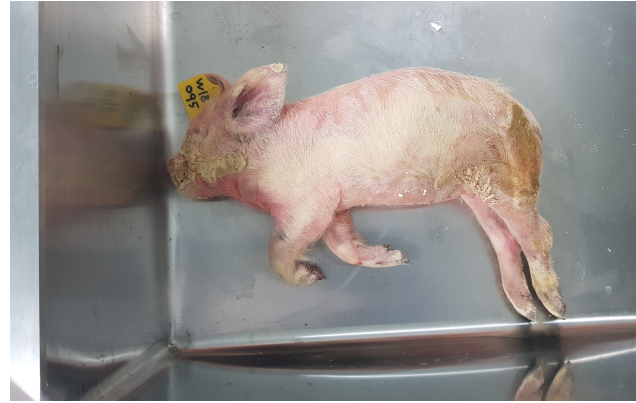

Rough hair coat  
Wasting  
Pale skin  
Prominent backbone  
Death

## Pig #3

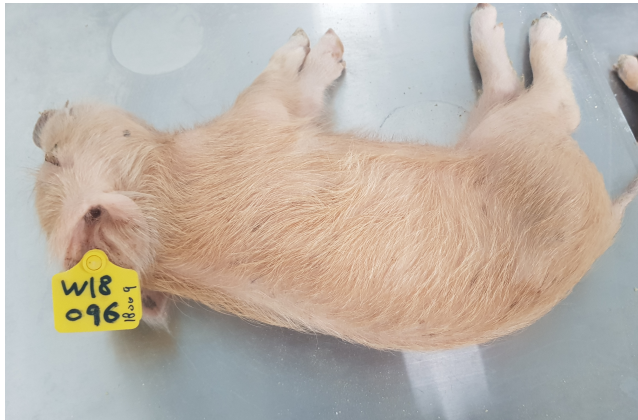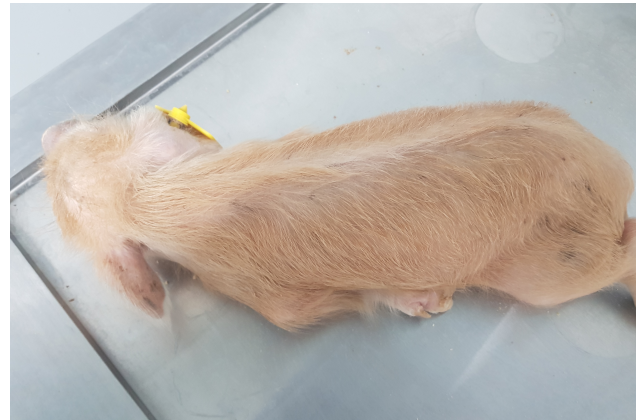

Rough hair coat  
Wasting  
Pale skin  
Prominent backbone

**Supplementary Figure 1.** Postmortem findings from piglets of PCV2d infection group (n=3) in the experimental infection/pathogenicity study (Experiment 1).
