# Supplementary material for: Pathological Evaluation of Porcine Circovirus 2d (PCV2d) Strain and Comparative Evaluation of PCV2d and PCV2b Inactivated Vaccines against PCV2d Infection in a Specific Pathogen-Free (SPF) Yucatan Miniature Pig Model
Source: Vaccines (Basel). 2022 Sep 5;10(9):1469. doi: 10.3390/vaccines10091469 (PMC9501194; doi:10.3390/vaccines10091469)
Supplement: Supplementary file 1 [file vaccines-10-01469-s001.zip › Table S1.xlsx]

## Sheet: Sheet1
		Supplementary Table 1. Histopathological findings in tissues of PCV2d infection group from experiment 1
		Pig No.	Organ	Histopathological findings
		1	Lung	Mild bronchopneumonia with atelectasis
				Mild peribronchiolar and perivascular inflammatory cell infiltration
			Tonsil	Severe lymphoid depletion and histiocytic replacement of lymphoid follicles
			Spleen	Moderate lymphoid depletion and histiocytic replacement of lymphoid follicles
			Liver	Moderate portal hepatitis
				Mild hepatocellular degeneration/necrosis
			Lymph node	Severe lymphoid depletion and histiocytic replacement of lymphoid follicles
			Ileum	Severe lymphoid depletion and histiocytic replacement of Peyer’s patch
			Colon	No remarkable lesions
		2	Lung	Mild bronchopneumonia with atelectasis
				Mild peribronchiolar and perivascular inflammatory cell infiltration
			Tonsil	Severe lymphoid depletion and histiocytic replacement of lymphoid follicles
			Spleen	Moderate lymphoid depletion and histiocytic replacement of lymphoid follicles
			Liver	Moderate portal hepatitis
				Mild hepatocellular degeneration/necrosis
			Lymph node	Severe lymphoid depletion and histiocytic replacement of lymphoid follicles
			Ileum	No remarkable lesions
			Colon	No remarkable lesions
		3	Lung	Mild bronchiolitis with atelectasis
				Minimal peribronchiolar and perivascular inflammatory cell infiltration
			Tonsil	Severe lymphoid depletion and histiocytic replacement of lymphoid follicles
				Numerous intranuclear/intracytoplasmic inclusion bodies in the histiocytes
			Spleen	Severe lymphoid depletion and histiocytic replacement of lymphoid follicles
			Liver	Moderate portal hepatitis
				Severe hepatocellular degeneration/necrosis
			Lymph node	Severe lymphoid depletion and histiocytic replacement of lymphoid follicles
				Numerous intranuclear/intracytoplasmic inclusion bodies in the histiocytes
			Ileum	Moderate lymphoid depletion and histiocytic replacement of Peyer’s patch
			Colon	Mild inflammatory cell infiltration in the submucosa
				Mild crypt abscess

## Sheet: Sheet2
			1	Lung	Mild bronchopneumonia with atelectasis
					Mild peribronchiolar and perivascular inflammatory cell infiltration
				Tonsil	Severe lymphoid depletion and histiocytic replacement of lymphoid follicles
				Spleen	Moderate lymphoid depletion and histiocytic replacement of lymphoid follicles
				Liver	Moderate portal hepatitis
					Mild hepatocellular degeneration/necrosis
				Lymph node	Severe lymphoid depletion and histiocytic replacement of lymphoid follicles
				Ileum	Severe lymphoid depletion and histiocytic replacement of Peyer’s patch
				Colon	No remarkable lesions
			2	Lung	Mild bronchopneumonia with atelectasis
					Mild peribronchiolar and perivascular inflammatory cell infiltration
				Tonsil	Severe lymphoid depletion and histiocytic replacement of lymphoid follicles
				Spleen	Moderate lymphoid depletion and histiocytic replacement of lymphoid follicles
				Liver	Moderate portal hepatitis
					Mild hepatocellular degeneration/necrosis
				Lymph node	Severe lymphoid depletion and histiocytic replacement of lymphoid follicles
				Ileum	No remarkable lesions
				Colon	No remarkable lesions
			3	Lung	Mild bronchiolitis with atelectasis
					Minimal peribronchiolar and perivascular inflammatory cell infiltration
				Tonsil	Severe lymphoid depletion and histiocytic replacement of lymphoid follicles
					Numerous intranuclear/intracytoplasmic inclusion bodies in the histiocytes
				Spleen	Severe lymphoid depletion and histiocytic replacement of lymphoid follicles
				Liver	Moderate portal hepatitis
					Severe hepatocellular degeneration/necrosis
				Lymph node	Severe lymphoid depletion and histiocytic replacement of lymphoid follicles
					Numerous intranuclear/intracytoplasmic inclusion bodies in the histiocytes
				Ileum	Moderate lymphoid depletion and histiocytic replacement of Peyer’s patch
				Colon	Mild inflammatory cell infiltration in the submucosa
					Mild crypt abscess
