# Supplementary material for: Pathological Evaluation of Porcine Circovirus 2d (PCV2d) Strain and Comparative Evaluation of PCV2d and PCV2b Inactivated Vaccines against PCV2d Infection in a Specific Pathogen-Free (SPF) Yucatan Miniature Pig Model
Source: Vaccines (Basel). 2022 Sep 5;10(9):1469. doi: 10.3390/vaccines10091469 (PMC9501194; doi:10.3390/vaccines10091469)
Supplement: Supplementary file 1 [file vaccines-10-01469-s001.zip › Table S2.xlsx]

## Sheet: Sheet1
		Supplementary Table 2. Histopathological findings in lungs, lymph nodes, and spleen of vaccinated and non-vaccinated groups from experiment 2
		Group	Pig No.	Organ	Histopathological findings
		PCV2b vaccinated	1	Lung	Mild peribronchiolar and perivascular inflammatory cell infiltration
				Lymph node	Mild reactive lymphoid hyperplasia
				Spleen	No remarkable lesions
			2	Lung	Mild peribronchiolar and perivascular inflammatory cell infiltration
				Lymph node	No remarkable lesions
				Spleen	No remarkable lesions
			3	Lung	Mild peribronchiolar and perivascular inflammatory cell infiltration
				Lymph node	Mild reactive lymphoid hyperplasia
				Spleen	No remarkable lesions
			4	Lung	Mild peribronchiolar and perivascular inflammatory cell infiltration
					Minimal BALT hyperplasia
				Lymph node	Mild reactive lymphoid hyperplasia
				Spleen	No remarkable lesions
			5	Lung	No remarkable lesions
				Lymph node	Mild reactive lymphoid hyperplasia
				Spleen	No remarkable lesions
		PCV2d vaccinated	6	Lung	Minimal peribronchiolar and perivascular inflammatory cell infiltration
					Minimal alveolar wall thickening
				Lymph node	Mild reactive lymphoid hyperplasia
				Spleen	No remarkable lesions
			7	Lung	No remarkable lesions
				Lymph node	Mild reactive lymphoid hyperplasia
				Spleen	No remarkable lesions
			8	Lung	No remarkable lesions
				Lymph node	No remarkable lesions
				Spleen	No remarkable lesions
			9	Lung	Minimal peribronchiolar and perivascular inflammatory cell infiltration
				Lymph node	Mild reactive lymphoid hyperplasia
				Spleen	No remarkable lesions
			10	Lung	Mild peribronchiolar and perivascular inflammatory cell infiltration
				Lymph node	Mild reactive lymphoid hyperplasia
				Spleen	No remarkable lesions
		Non-vaccinated	1C	Lung	Moderate bronchiolitis with atelectasis
					Moderate peribronchiolar and perivascular inflammatory cell infiltration
					Moderate alveolar wall thickening
				Lymph node	Severe lymphoid depletion of lymphoid follicles
				Spleen	Moderate lymphoid depletion and histiocytic replacement in the white pulps
			2C	Lung	Moderate bronchiolitis with atelectasis
					Severe peribronchiolar and perivascular inflammatory cell infiltration
					Moderate alveolar wall thickening
				Lymph node	Severe lymphoid depletion and histiocytic replacement of lymphoid follicles
					Moderate granulomatous inflammation with presence of multinucleated giant cells
				Spleen	Severe lymphoid depletion and histiocytic replacement in the white pulps
			3C	Lung	Moderate bronchopneumonia with atelectasis
					Severe peribronchiolar and perivascular inflammatory cell infiltration
					Moderate alveolar wall thickening
				Lymph node	Moderate lymphoid depletion and histiocytic replacement of lymphoid follicles
					Severe granulomatous inflammation with presence of multinucleated giant cells
				Spleen	Moderate lymphoid depletion and histiocytic replacement in the white pulps
		BALT, bronchus-associated lymphoid tissue.
